# Supplementary material for: CsPAO2 Improves Salt Tolerance of Cucumber through the Interaction with CsPSA3 by Affecting Photosynthesis and Polyamine Conversion
Source: MDPI journal article supplement (doi:10.3390/ijms232012413), 2022-10-17
Supplement: s1 [file s1]

**Table S1.** Primers used in this study.

| Primer name | Forward primer (5' to 3')                        | Reverse primer (5' to 3')                              |
|-------------|--------------------------------------------------|--------------------------------------------------------|
| AtActin     | GGTAACATTGTGCTCAGTGGTGG                          | AACGACCTTAATCTTCATGCTGC                                |
| GFP         | CATCTTCTTCAAGGACGA                               | GTGGCTGTTGTAGTTGTA                                     |
| pAC402-     | tacaaatctatctctctcgagATGTCCGTG                   | GgatccccgggtaccgagctcAGTTTCATT                         |
| PSA3        | ACCTCAACTAGCAC                                   | ATTCTCTTGGAGAAATTGG                                    |
| pAC013-     | ggactctagaggatccccgggATGGAATCC                   | gcccttgctcaccatggtacc CATTCGAGA                        |
| PAO2        | GGAGCCAAGAGTAATTCCGA                             | AATTAACAAAGGTGCCGATA                                   |
| BD-PAO2     | atggccatggaggccgaattcATGGAATCC<br>GGAGCCAAGA     | GcaggctgacggatccccgggCATTCGAGA<br>AATTAACAAAGGTGC      |
| AD-PSA3     | gccatggaggccagtgaattcATGTCCGTG<br>ACCTCAACTAGCAC | cagctcgagctcgatggatccTTAAGTTTC<br>ATTATTCTCTTGGAGAAATT |
| ZYN-        | atttacgaacgatagtaattaaATGGAATCC                  | actgccacctcctccactagtCATTCGAGA                         |
| PAO2        | GGAGCCAAGA                                       | AATTAACAAAGGTGC                                        |
| ZYC-        | atttacgaacgatagtaattaaATGTCCGTG                  | actgccacctcctccactagtAGTTTCATT                         |
| PSA3        | ACCTCAACTAGCAC                                   | ATTCTCTTGGAGAAATTGG                                    |
| nLUC-       | acgggggacgagctcggtaccATGGAATCC                   | cagtcgacgcgttgatccCATTCGAGA                            |
| PAO2        | GGAGCCAAGA                                       | AATTAACAAAGGTGC                                        |
| cLUC-       | tacggtccccggggcggtaccATGTCCGTG                   | cagtcgacgcgttgatccTTAAGTTTC                            |
| PSA3        | ACCTCAACTAGCAC                                   | ATTATTCTCTTGGAGAAATT                                   |
| pET32a-     | catggctgatatcgatccgaattcATGGAATCC                | agtgcggccgcaagctttgtcgacTTACATTCTG                     |
| PAO2        | GGAGCCAAGAGTAATTCCGA                             | AGAAATTAACAAAGGTGCCG                                   |
| pGEX4T1-    | aatctggttccgcgtggatccATGTCCGTG                   | CtcgagtcgacccgggaattcTTAAGTTTC                         |
| PSA3        | ACCTCAACTAGCAC                                   | ATTATTCTCTTGGAGAAATT                                   |
| pAC330-     | catatggggctgcaggaattcATGTCCGTG                   | gggactagaactagtgatccTTAAGTTTC                          |
| PSA3        | ACCTCAACTAGCAC                                   | ATTATTCTCTTGGAGAAATT                                   |
| pV190-      | aggactttacttaatggatccTATCGTTCTG                  | cctagacctataactggatccCAAACCTTAG                        |
| PAO2        | TGGTGGGGTGT                                      | GTAATAGTTTTAGATCCATAAAA                                |
| pV190-      | aggactttacttaatggatccGAGTCTAAA                   | cctagacctataactggatccAGCCTCATT                         |
| PSA3        | GCTTTCTATGAATTTCAAGA                             | CATCATAGCAAGGA                                         |

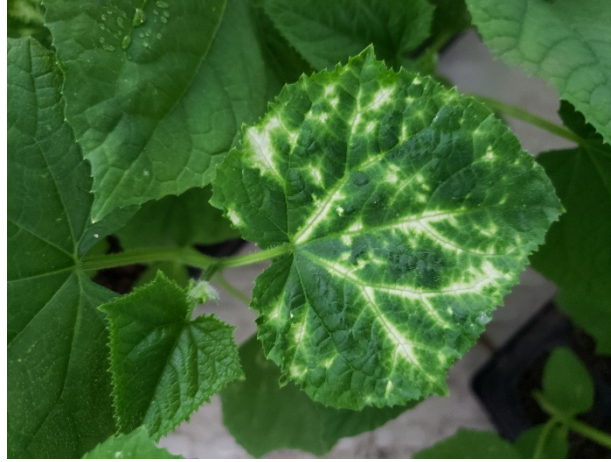

**Figure S1.** White streaks characteristic of silencing PDS in cucumber.

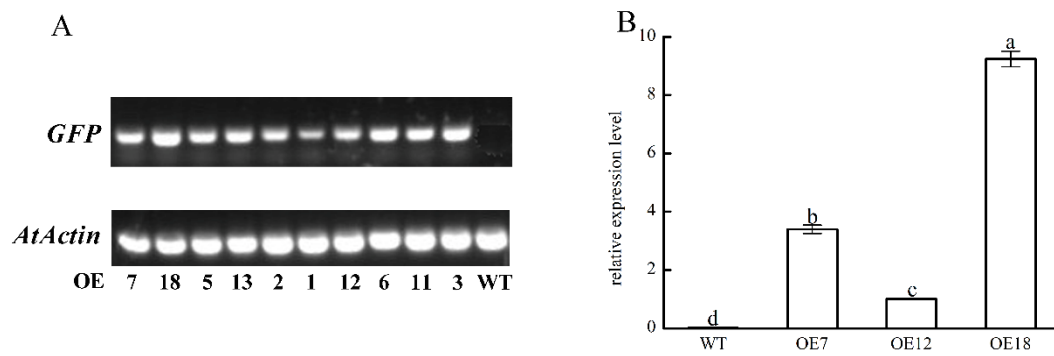

**Figure S2.** Semi-quantitative PCR analysis of *CsPAO2* expression and relative expression level of *CsPAO2* in OE7, OE12 and OE18. A, semi-quantitative PCR analysis; B, relative expression level of *CsPAO2* in OE7, OE12 and OE18. Relative expression level of *CsPAO2* in OE12 was taken as 1.

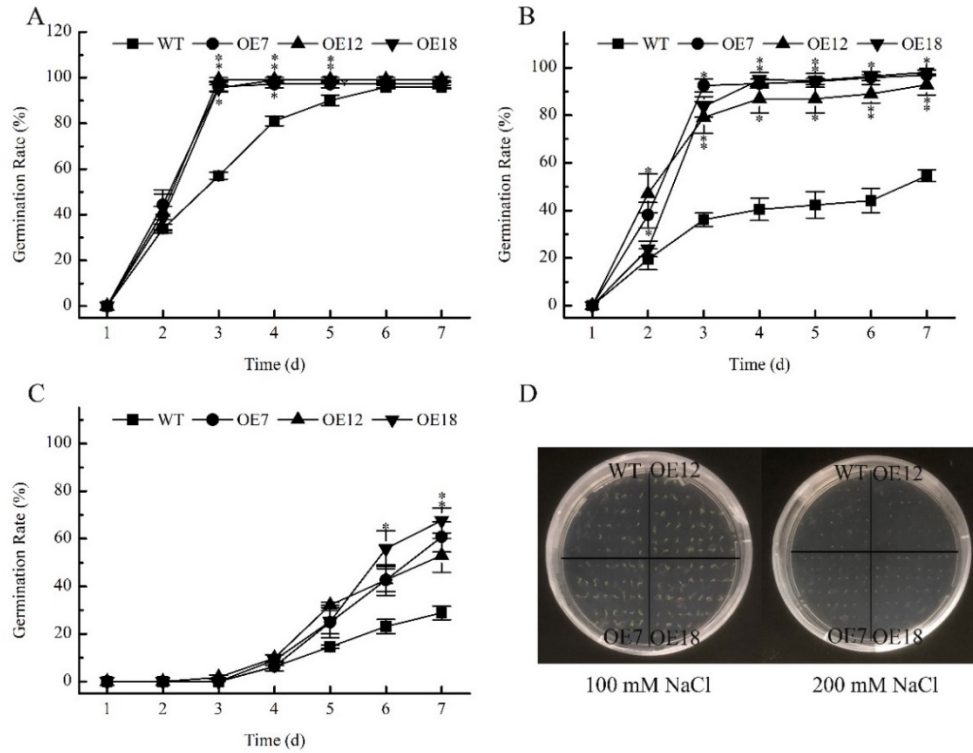

**Figure S3.** Seed germination rate of wild type (WT) and transgenic Arabidopsis lines (OE7, OE12 and OE18). A-C, time-course change of germination rate under 0 (A), 100 (B) and 200 (C) mM NaCl treatment. D, pictures of seeds grown on plates containing 100 and 200 mM NaCl for 7 days. Error bars represent standard error of three plates. Asterisks above lines indicate significant differences between WT and transgenic lines on the same day at  $P < 0.05$  (\*) according to Tukey test.

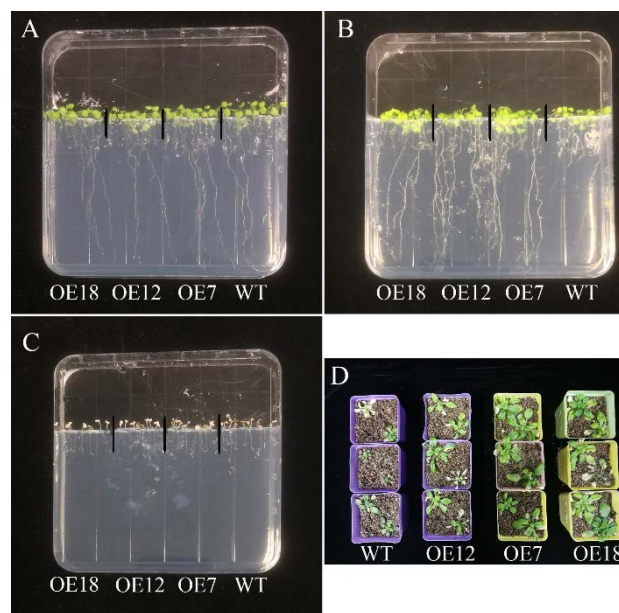

**Figure S4.** Root growth of wild type (WT) and transgenic plants (OE7, OE12 and OE18) under salt

stress. A-C, after 7 days of sowing on 1/2 MS medium without NaCl, seedlings were transferred onto 1/2 MS medium containing 0 (A), 100 (B) and 200 (C) mM NaCl, respectively, and pictures were taken on the seventh day. D, phenotype of Arabidopsis seedlings treated with 300 mM NaCl.

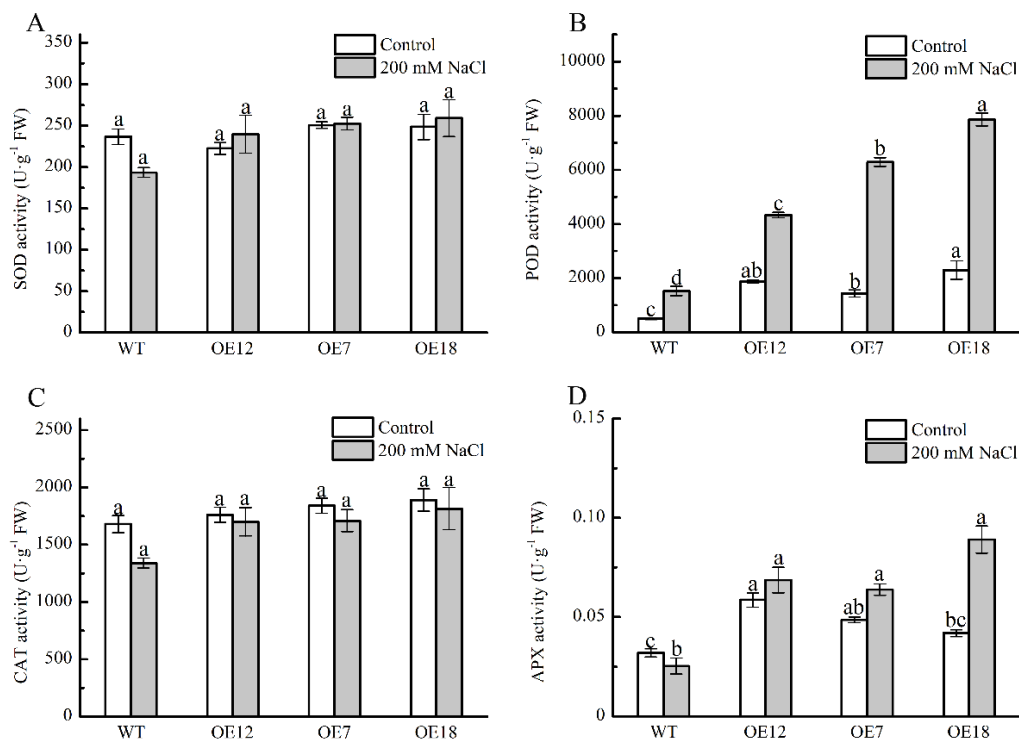

**Figure S5.** Antioxidant enzyme activities of wild type (WT) and transgenic Arabidopsis lines (OE12, OE7 and OE18). A, SOD; B, POD; C, CAT; D, APX. Arabidopsis seedlings cultivated in vermiculite were irrigated with 200 mM NaCl solution or water for 14 days. Error bars represent standard error of three replicates. The different letters indicate significant differences at  $P < 0.05$  between different genotypes under the same treatment according to Tukey test.
